# Supplementary material for: Fisetin may protect early porcine embryos from oxidative stress by down-regulating GRP78 levels
Source: PeerJ. 2025 Mar 28;13:e19198. doi: 10.7717/peerj.19198 (PMC11956767; doi:10.7717/peerj.19198)
Supplement: Supplemental Information 1 — Represented by the ratio of blastocysts to total cells contained in each group [file peerj-13-19198-s001.xlsx]

## Sheet: Sheet1
	0μM	0.01μM	0.1μM	1μM
1	0.325	0.2609	0.3571	0.2439
2	0.4118	0.3242	0.4571	0.2424
3	0.4359	0.4	0.5135	0.4103
4	0.3421	0.3421	0.4211	0.2286
5	0.2647	0.3143	0.4118	0.3143
6	0.4375	0.4412	0.5	0.2424
7	0.3947	0.425	0.45	0.3421
8	0.2857	0.4	0.6111	0.2857
9	0.4003	0.475	0.4878	0.359
10	0.4615	0.5	0.6316	0.4474
11	0.2778	0.4167	0.5	0.2222
