# Supplementary material for: Fisetin may protect early porcine embryos from oxidative stress by down-regulating GRP78 levels
Source: PeerJ. 2025 Mar 28;13:e19198. doi: 10.7717/peerj.19198 (PMC11956767; doi:10.7717/peerj.19198)
Supplement: Supplemental Information 2 — Cleavage is defined as the development of oocytes to the two- or four-cell stage, and the ratio of the total number of oocytes to the total number of oocytes at the time of titration is the cleavage rate. [file peerj-13-19198-s002.xlsx]

## Sheet: Sheet1
	concentration（μmol）	cleaved oocyte	Number of oocytes	ovarian cleavage rate
1	0	46	50	0.92
	0.01	45	49	0.918367
	0.1	47	49	0.959184
	1	48	50	0.96
2	0	30	36	0.833333
	0.01	32	37	0.864865
	0.1	31	35	0.885714
	1	33	36	0.916667
3	0	28	32	0.875
	0.01	31	32	0.96875
	0.1	31	32	0.96875
	1	30	32	0.9375
4	0	33	38	0.868421
	0.01	36	38	0.947368
	0.1	34	38	0.894737
	1	32	36	0.888889
5	0	31	34	0.911765
	0.01	31	35	0.885714
	0.1	33	35	0.942857
	1	30	34	0.882353
6	0	27	32	0.84375
	0.01	31	34	0.911765
	0.1	29	32	0.90625
	1	29	33	0.878788
7	0	33	39	0.846154
	0.01	34	40	0.85
	0.1	35	40	0.875
	1	33	39	0.846154
