# Supplementary material for: Fisetin may protect early porcine embryos from oxidative stress by down-regulating GRP78 levels
Source: PeerJ. 2025 Mar 28;13:e19198. doi: 10.7717/peerj.19198 (PMC11956767; doi:10.7717/peerj.19198)
Supplement: Supplemental Information 3 — Represents the proliferative capacity of blastocyst cells. [file peerj-13-19198-s003.xlsx]

## Sheet: Sheet1
0μM	0.1μM
0.12	0.47
0.5	0.26
0.38	0.48
0.22	0.52
0.21	0.27
0.3	0.31
0.42	0.33
0.12	0.3
0.12	0.44
0.45	0.63
0.36	0.37
0.14	0.35
0.23	0.4
0.22	0.29
0.3	0.22
0.19	0.18
0.1	0.44
0.25	0.26
0.17	0.3
0.17	0.19
0.32	0.45
0.3	0.29
0.46	0.17
0.35	0.45
0.5	0.42
0.5	0.44
0.43	0.2
0.17	0.22
0.4	0.25
0.24	0.46
0.13	0.37
0.23	0.28
0.31	0.2
0.13	0.29
0.14	0.6
0.13	0.29
0.44	0.63
0.12	0.36
	0.47
	0.36
	0.38
	0.32
	0.28
	0.31
	0.17
	0.27
	0.24
	0.37
