# Supplementary material for: Fisetin may protect early porcine embryos from oxidative stress by down-regulating GRP78 levels
Source: PeerJ. 2025 Mar 28;13:e19198. doi: 10.7717/peerj.19198 (PMC11956767; doi:10.7717/peerj.19198)
Supplement: Supplemental Information 4 [file peerj-13-19198-s004.xlsx]

## Sheet: Sheet1
	0μM			0.1μM
‘OCT4	1	1	1	1.4	1.58	1.19
NANOG	1	1	1	2.22	2.16	2.26
ESRRB	1	1	1	1.2	1.07	1.15
SOX2	1	1	1	3.02	2.13	2.11
CAS3	1	1	1	0.46	0.77	0.68
CAS8	1	1	1	0.28	0.3	0.28
BAX	1	1	1	0.19	0.44	0.73
BCL2	1	1	1	1.15	1.25	1.28
UCHL1	1	1	1	2.48	2.46	2.28
SOD2	1	1	1	1.2	1.38	1.09
SIRT1	1	1	1	1.25	1.81	1.14
Nrf2	1	1	1	2.23	2.43	2.01
PGC1α	1	1	1	1.8	1.59	1.58
TFAM	1	1	1	1.24	1.67	1.78
LC3B	1	1	1	0.19	0.17	0.54
ATG5	1	1	1	0.58	0.51	0.74
BECLIN	1	1	1	0.78	0.08	0.7
P62	1	1	1	0.82	0.63	0.49
eIF2α	1	1	1	0.88	0.77	0.58
GRP78	1	1	1	0.64	0.82	0.71
CHOP	1	1	1	0.28	0.55	0.42
ATF6	1	1	1	0.68	0.7	0.63
ATF4	1	1	1	0.17	0.18	0.06
uXBP1	1	1	1	0.95	0.93	0.997
sXBP1	1	1	1	0.88	0.66	0.8
