# Supplementary material for: Fisetin may protect early porcine embryos from oxidative stress by down-regulating GRP78 levels
Source: PeerJ. 2025 Mar 28;13:e19198. doi: 10.7717/peerj.19198 (PMC11956767; doi:10.7717/peerj.19198)
Supplement: Supplemental Information 5 — Fluorescent expression levels of GRP78. [file peerj-13-19198-s005.xlsx]

## Sheet: Sheet1
0μM	0.1μM
0.93	0.9
0.97	0.97
1	0.88
0.87	0.83
0.9	0.99
0.98	1.01
1.11	0.86
0.96	0.86
1.17	0.81
0.95	0.87
1.11	1
1	0.92
1.06	0.96
0.98	0.89
1.13	0.89
0.93	1.06
0.97	0.9
0.94	0.94
0.92	0.98
1.09	0.86
0.94	1.02
0.98	0.97
1.11	0.91
0.91	0.87
0.98	0.88
0.95	0.92
1.05	0.9
1.1	0.9
1.02	0.95
0.98	0.91
0.88	0.97
0.91	0.87
0.99	0.85
1.02	0.76
0.89	0.83
1.2	0.87
0.98	0.92
0.94	0.94
1.04	0.87
0.99	0.8
1.15	0.8
1.1	0.95
0.91	1
	0.85
	0.87
	0.94
	1.03
	0.92
	0.85
	0.95
	0.89
	0.88
	0.98
	1.04
	0.95
	0.85
	0.9
	0.89
	0.98
