# Supplementary material for: Fisetin may protect early porcine embryos from oxidative stress by down-regulating GRP78 levels
Source: PeerJ. 2025 Mar 28;13:e19198. doi: 10.7717/peerj.19198 (PMC11956767; doi:10.7717/peerj.19198)
Supplement: Supplemental Information 6 — Relative expression levels of the target protein GRP78 to β-actin ratio. [file peerj-13-19198-s006.xlsx]

## Sheet: Sheet1
0μM	0.1μM
1	0.77
1	0.87
1	0.5
