# Supplementary material for: Fisetin may protect early porcine embryos from oxidative stress by down-regulating GRP78 levels
Source: PeerJ. 2025 Mar 28;13:e19198. doi: 10.7717/peerj.19198 (PMC11956767; doi:10.7717/peerj.19198)
Supplement: Supplemental Information 7 — Representing the antioxidant capacity of early embryos. [file peerj-13-19198-s007.xlsx]

## Sheet: Sheet1
0μM	0.1μM
1	1.04
0.97	0.93
0.9	1.14
0.9	1.13
1.02	1.22
1.05	0.93
0.91	1.17
0.91	1.2
0.91	1.14
1.1	1.09
0.91	1.18
1.11	1.08
1.1	1.12
0.97	1.09
0.94	1.22
1.07	1.01
1	1.06
1.1	1.17
1	0.96
1.08	0.94
0.98	1.19
1.03	1.2
1.02	1.02
1	1.11
0.98	0.95
1.01	1.19
0.99	1.03
1.02	1.04
0.98	1.05
0.99	1.07
1.03	1.05
0.91	1.05
1.05	1.06
0.92	1.05
1.02	1.06
1.03	1.04
0.99	1.03
1.01	1.08
1.04	1.06
1.03	1.04
1.02	1.06
0.94	1.08
0.98	1.07
0.99	1.07
1.01	1.04
1	1.05
1	1.02
1.01	1.08
1.01	1.07
1.02	1.07
1.02	1.06
1.01	1.06
0.97	1.07
0.97	1.08
0.99	1.03
0.96	0.98
1	1.01
1	1.05
1.01	1.03
1.03	1.04
1.01	0.99
1.01	1.04
0.99	1.03
1.01	1.02
	1.03
	1.01
	1.03
	1.01
	1
	1
	1.02
	1.01
	1.04
	1
	1.03
	1.01
	1.02
