# Supplementary material for: Fisetin may protect early porcine embryos from oxidative stress by down-regulating GRP78 levels
Source: PeerJ. 2025 Mar 28;13:e19198. doi: 10.7717/peerj.19198 (PMC11956767; doi:10.7717/peerj.19198)
Supplement: Supplemental Information 8 — The ratio of red fluorescence to green fluorescence represents the level of membrane potential within mitochondria. [file peerj-13-19198-s008.xlsx]

## Sheet: Sheet1
0μM	0.1μM
0.97	1.12
0.98	1.34
1	1.15
1	1.05
1.01	1.14
1.4	1.23
0.97	1.23
1.16	1.07
0.88	1.12
0.86	1.13
0.9	1.17
0.88	1.02
1.06	1.2
0.96	1.33
1.07	1.43
0.95	1.26
1.03	1.11
0.93	1.1
0.98	1.48
1.24	1.13
1.12	1.08
0.83	1.12
1.24	0.93
0.89	1.26
0.93	1.21
1.14	1.44
0.76	0.85
0.98	0.9
1.11	0.98
0.89	1.38
1.11	1
0.82	1.23
1.1	1.51
0.8	0.96
0.89	0.85
0.81	1.02
1.24	1.22
0.86	1.14
1.11	1.04
1.22	1.25
0.79	1.24
1.04	1.02
0.9	1.38
0.99	0.89
0.76	0.83
0.81	1.23
0.88	1.02
1.03	1.52
	0.97
	0.92
	0.92
	1.16
	0.84
	0.9
	0.95
	1.19
	1.34
