# Supplementary material for: Fisetin may protect early porcine embryos from oxidative stress by down-regulating GRP78 levels
Source: PeerJ. 2025 Mar 28;13:e19198. doi: 10.7717/peerj.19198 (PMC11956767; doi:10.7717/peerj.19198)
Supplement: Supplemental Information 9 — Represents the degree of autophagy during early porcine embryonic development. [file peerj-13-19198-s009.xlsx]

## Sheet: Sheet1
0μM	0.1μM
1	0.53
1.34	0.72
1.09	0.67
1.14	0.79
0.72	0.87
0.97	0.54
0.79	1.02
1.19	0.52
1.12	0.98
0.99	0.46
1.19	0.6
1.39	0.82
1.38	0.91
1.24	0.68
0.67	0.64
0.86	0.36
1.07	0.62
0.93	0.35
0.94	0.57
1.21	0.53
1.48	0.82
0.9	0.57
0.96	0.64
0.92	0.91
0.88	0.55
0.78	0.89
0.98	0.9
1.09	0.7
1.09	0.78
1.11	0.44
0.95	0.75
0.84	0.88
	0.54
	0.58
	0.74
	0.68
	0.7
	0.57
	0.59
