# Supplementary material for: Fisetin may protect early porcine embryos from oxidative stress by down-regulating GRP78 levels
Source: PeerJ. 2025 Mar 28;13:e19198. doi: 10.7717/peerj.19198 (PMC11956767; doi:10.7717/peerj.19198)
Supplement: Supplemental Information 10 — Representing the antioxidant capacity of the embryo. [file peerj-13-19198-s010.xlsx]

## Sheet: Sheet1
0μM	0.1μM
0.99	1.06
1.02	0.9
0.99	0.76
1.06	1.05
0.96	0.94
0.95	0.96
1	0.86
1.08	0.75
1.02	0.87
0.99	0.99
0.89	1.02
0.96	1.02
0.98	0.88
1.06	0.8
0.98	0.98
1.01	0.71
1.03	0.88
0.98	0.76
1.03	0.74
0.96	0.99
1.03	0.94
0.88	0.82
1.01	0.95
0.75	0.87
1.05	0.79
1.07	0.88
1.13	0.62
1.08	0.63
1.09	0.84
1.03	0.71
0.82	0.91
0.98	0.94
0.99	1
0.97	0.78
1.16	0.86
0.82	0.83
1.1	0.77
1.1	0.98
0.99	0.72
1.04	0.95
0.96	0.68
