# Supplementary material for: Fisetin may protect early porcine embryos from oxidative stress by down-regulating GRP78 levels
Source: PeerJ. 2025 Mar 28;13:e19198. doi: 10.7717/peerj.19198 (PMC11956767; doi:10.7717/peerj.19198)
Supplement: Supplemental Information 11 — Representing the level of apoptosis during embryonic development. [file peerj-13-19198-s011.xlsx]

## Sheet: Sheet1
0μM	0.1μM
0.0476	0.0244
0.0606	0.0588
0.129	0.0294
0.0556	0.0444
0.0656	0.0909
0.1034	0.0357
0.15	0.0962
0.1081	0.0625
0.1515	0.0303
0.075	0.0267
0.0714	0.0345
0.0426	0.0417
0.1034	0.0385
0.0526	0.027
0.0488	0.0667
0.1071	0.0588
0.1667	0.0556
0.1282	0.0588
0.125	0.0282
0.0784	0.0448
0.0833	0.0794
0.1148	0.0536
0.0488	0.0282
0.1395	0.0156
0.0536	0.04
0.0263	0.0698
0.0299	0.0169
0.093	0.087
0.0541	0.0448
0.0208	0.0323
0.1563	0.0392
0.0179	0.075
0.069	0.0244
	0.0444
	0.0294
