# Supplementary material for: Fisetin may protect early porcine embryos from oxidative stress by down-regulating GRP78 levels
Source: PeerJ. 2025 Mar 28;13:e19198. doi: 10.7717/peerj.19198 (PMC11956767; doi:10.7717/peerj.19198)
Supplement: Supplemental Information 12 — Expressed as number of cells per blastocyst. [file peerj-13-19198-s012.xlsx]

## Sheet: Sheet1
0μM	0.1μM
57	51
41	54
28	51
30	71
39	67
32	63
51	56
48	71
61	64
41	43
43	50
48	25
52	47
41	41
65	43
54	59
69	36
57	67
47	65
37	65
55	66
51	60
35	38
43	52
31	67
74	54
38	57
49	43
40	46
31	56
24	40
60	65
26	49
37	35
59	65
26	57
44	71
25	69
42	33
28	43
43	28
30	28
36	54
44	32
43	31
34	58
33	51
50	64
28	39
68	54
48	57
26	51
26	40
52	35
26	55
42	72
34	45
29	43
43	51
57	43
26	41
44	35
40	47
33	56
46	48
59	28
58	50
42	32
27	44
	47
	42
	38
	33
	54
	51
	35
	28
	65
	62
